# Supplementary material
Source: Royal Society of Chemistry journal article supplement (https://www.rsc.org/suppdata/cc/1998/2593/807365a.doc)
Supplement: Supplementary file 1 [file 807365a.doc]

Decarboxylation of an α-amino acid coordinated to cobalt(III): kinetic stabilisation and molecular structure of a Co-C-N three-membered ring incorporated into a cobalt(III) macrocyclic ligand complex

**Deborah M. Tonei, Lisa-Jane Baker, Penelope J. Brothers, George R. Clark and David C. Ware***

*Department of Chemistry, The University of Auckland, Private Bag 92019, Auckland, New Zealand.*

# Supplementary Data

Experimental data for the complexes reported in the paper

(Elemental analysis, 1H NMR, 13C{1H} NMR, UV/visible data)

Electrochemistry: E1/2 values were measured by cyclic voltammetry using [nBu4N]PF6 (0.1 mol L-1) in CH3CN, with ferrocene (*ca*. +0.42 V *vs.* Ag/AgCl) as an internal reference using a glassy carbon working electrode, a Pt wire counter electrode and an Ag/AgCl reference electrode, 100 mV s-1 scan rate, 25 °C.

NMR data: Carbon atoms are numbered as in the crystal structures. Protons are given the same numbers as the carbon atoms to which they are attached. Ha and Hb are inequivalent

geminal protons. Chemical shifts for spectra measured in CD3CN and D2O are quoted relative to TMS and TSP-*d4*, respectively.

***Selected data* for [Co(L1)]BPh4**

*Anal.* Found: C, 68.24; H,7.06; N, 8.60 %.

C37H46BCoN4O2 requires: C, 68.53; H, 7.14; N, 8.64 %.

*1H NMR (400 MHz, CD3CN)*

 4.43 br s, 1H, NH 3.44 d, 1H, H11a, 2*J* = 17 Hz

3.20 s, 2H, H13 3.09 ddd, 1H, H10a, 2*J* = 13 Hz, 3*J* = 4 Hz

2.95 m, 1H, H1a 2.93 m, 1H, H6a

2.85 m, 2H, H5 2.69 d, 1H, H11b, 2*J* = 17 Hz

2.55 m, 1H, H10b 2.50 m, 1H, H1b

2.34 m, 1H, H3a 2.33 m, 1H, H8a

2.26 m, 1H, H6b 2.25 m, 1H, H3b

2.25 m, 1H, H2a 2.23 m, 1H, H7a

2.05 m, 1H, H2b 2.04 m, 1H, H7b

1.98 m, 1H, H8b 1.82 m, 2H, H4

1.75 m, 1H, H9a 1.33 m, 1H, H9b

*13C{1H} NMR (100 MHz, CD3CN)*

 179.57 (C12), 63.92 (C11), 61.16 (C3),

59.96 (C2), 56.63 (C1), 53.72 (C10),

52.69 (C6), 51.80 (C5), 51.21 (C7),

47.03 (C8), 25.57 (C4), 25.11, (C13),

23.90 (C9)

## UV/vis (CH3CN) λ 500(sh), 447, 316 (sh) nm.

*Electrochemistry (CH3CN)* *E*½ = -1.29 V *vs*. Fc+/Fc (Ep = 63 mV, *i*pc/*i*pa = 1.05)

***Selected data* for [CoCl(L2)]ClO4**

*Anal.* Found: C, 33.44; H, 6.11; N, 11.84, Cl, 15.21%.

C13H27Cl2CoN4O6 requires: C, 33.56; H, 5.85; N, 12.04, Cl, 15.24%.

*1H NMR (400 MHz, D2O/TSP)*

 4.17 d, 1H, H11a, 2*J* = 19 Hz

3.71 ddd, 1H, H2a, 2*J* = 13 Hz, 3*J* = 4 Hz

3.40 m, 1H, H3a

3.39 d, 1H, H11b, 2*J* = 19 Hz

3.10 - 2.98 m, 3H, H5a, H2a, H7a

2.92 m, 1H, H6a

2.84 m, 1H, H1a

2.74 m, 1H, H1b

2.75 - 2.57 m, 5H, H6b, H7b, H10a, H3b, H8a

2.49 s, 3H, H13

2.45 m, 1H, H8b

2.32, 2.12 m, 4H, H10b, H4, H5b

2.00 m, 1H, H9a

1.96 m, 1H, H9b

*13C{1H} NMR (100 MHz, D2O/TSP)*

 186.41 (C12), 66.70 (C2), 63.92 (C1),

63.03 (C11), 62.60 (C10), 58.10 (C3),

56.33 (C7), 56.19 (C6), 53.07 (C13),

51.70 (C8), 49.28 (C5), 27.11, (C4),

26.78 (C9)

*UV/vis (H2O)* λ 583, 483, 384 nm.

*Electrochemistry (CH3CN) E*½ = -0.73 V *vs*. Fc+/Fc (Ep = 69 mV, *i*pc/*i*pa = 1.03).

*Crystal data* for[CoCl(L2)]ClO4: Crystals were grown from aqueous solution. C13H27Cl2CoN4O6, *M* = 465.22, triclinic, space group P-1, *a* = 8.456(2), *b* = 9.689(3), *c* = 12.161(6) Å,  = 90.95(3),  = 109.51(3),  = 96.09(2), *U* = 932.4(6) Å3, *F*(000) = 480, *Dc* = 1.650 g cm-3, *Z* = 2, ( Mo-K,  = 0.71069 Å) = 1.245 mm-1. Intensity data were collected to a  limit of 25 on an Enraf-Nonius CAD-4 diffractometer1 at 292(2) K and corrected for absorption.2 Structure solution as above. The riding model was used for all hydrogens. Refinement converged to 0.0571 (*Rw* = 0.1546) for 2561 reflections for which *I* > 2*(I)*.

1 Enraf-Nonius (1989). CAD-4 Software, Enraf-Nonius, Delft, The Netherlands.

2 North, A.C.T., Phillips, D.C., Matthews, F.S. (1968). Acta Cryst. A24, 351-359.

Selected bond lengths (Å) and angles (°) for [CoCl(L2)]ClO4 (see Figure S1 for molecular structure): Co-O(1) 1.894(3), Co-N(1) 2.054(4), Co-N(2) 1.982(4), Co-N(3) 1.975(4), Co-N(4) 1.984(5), Co-Cl(1) 2.2376(17), N(1)-C(13) 1.497(6), O(1)-Co-Cl(1) 175.89(12), C(13)-N(1)-Co 116.3(3).
